# Supplementary material
Source: PubMed Central journal article supplement (PMC6551984)
Supplement: Supp_Table1.pdf [file Supp_Table1.pdf]

## Supplementary Data

SUPPLEMENTARY TABLE S1. CONTACT SPORT POSITIONS

| <i>Variable</i>     | <i>Value</i>             | <i>CS-SRC</i> | <i>CS-Control</i> | <i>p value</i> |
|---------------------|--------------------------|---------------|-------------------|----------------|
| Football position   | Offensive line/tight end | 25            | 17                | 0.39           |
|                     | Running back/quarterback | 14            | 15                |                |
|                     | Defensive back           | 15            | 11                |                |
|                     | Defensive line           | 15            | 21                |                |
|                     | Linebacker               | 24            | 22                |                |
|                     | Wide receiver            | 11            | 14                |                |
|                     | Kicker/special teams     | 1             | 5                 |                |
| Ice hockey position | Forward                  | 4             | 3                 | 0.69           |
|                     | Defense                  | 2             | 1                 |                |
|                     | Goalkeeper               | 1             | 2                 |                |
| Lacrosse position   | Attacker                 | 2             | 2                 | 0.66           |
|                     | Midfielder               | 1             | 0                 |                |
|                     | Defender                 | 4             | 3                 |                |
| Soccer position     | Midfielder               | 4             | 6                 | 0.20           |
|                     | Forward                  | 7             | 8                 |                |
|                     | Goalkeeper               | 4             | 0                 |                |
|                     | Defender                 | 4             | 5                 |                |

CS-SRC, contact sport with sport-related concussion; CS-Control, contact sport control.
